# Supplementary material
Source: PubMed Central journal article supplement (PMC1949386)
Supplement: mbc_E07-03-0274_2.pdf [file mbc_E07-03-0274_2.pdf]

Supplementary Table 1. **Non-ribosomal proteins identified from TOR-DRMs by mass spectrometry**

| Name   | Description/gene product                               | Number of unique peptides | Sequence coverage | Subcellular localization           |
|--------|--------------------------------------------------------|---------------------------|-------------------|------------------------------------|
| Arf1   | GTPase of the Ras superfamily                          | 7                         | 51.9%             | Golgi                              |
| Mir1   | Mitochondrial phosphate carrier                        | 9                         | 44.1%             | Mitochondria                       |
| Apa1   | AP4A phosphorylase                                     | 5                         | 29.6%             | Cytoplasm/Nucleus                  |
| Sar1   | GTPase, GTP-binding protein of the ARF family          | 4                         | 27.4%             | Golgi/ER/COPII vesicle coat        |
| Yhm1   | GTP/GDP transporter                                    | 4                         | 25.3%             | Mitochondria                       |
| Nap1   | Nucleosome Assembly Protein                            | 6                         | 24.5%             | Cytoplasm/Nucleus                  |
| Mck1   | Meiotic and Centromere regulatory ser, tyr-Kinase      | 6                         | 21.6%             | Unknown                            |
| Vps74  | Vacuolar Protein Sorting                               | 3                         | 17.7%             | Cytoplasm/Nucleus                  |
| Vma4   | vacuolar H(+) ATPase subunit                           | 3                         | 17.2%             | Vacuole                            |
| Por1   | Mitochondrial porin                                    | 3                         | 17.0%             | Mitochondria                       |
| Cct8   | Subunit of the cytosolic chaperonin Cct ring complex   | 4                         | 16.5%             | Cytoplasm/Cytoskeleton             |
| Sec14  | PtdIns/PtdCho transfer protein                         | 3                         | 16.1%             | ER/Cytoplasm                       |
| Tsa1   | Thioredoxin-peroxidase                                 | 3                         | 15.3%             | Cytoplasm                          |
| Hom3   | Aspartate kinase                                       | 5                         | 15.0%             | Cytoplasm                          |
| Slf2   | Serine/threonine MAP kinase, suppressor of <i>lyt2</i> | 3                         | 14.5%             | Bud tip/Cytoplasm/Nucleus          |
| Yhm2   | mtDNA stabilizing protein                              | 2                         | 13.4%             | Mitochondria                       |
| Fur1   | Uracil phosphoribosyltransferase                       | 2                         | 13.1%             | Unknown                            |
| Sec21  | Gamma subunit of coatomer                              | 8                         | 12.5%             | COPI vesicle coat                  |
| Sec24  | Component of COPII vesicle coat                        | 7                         | 12.2%             | COPII vesicle coat                 |
| Pdx1   | Pyruvate dehydrogenase complex protein X component     | 3                         | 12.0%             | Mitochondria                       |
| Rvs161 | BAR adaptor protein                                    | 2                         | 11.7%             | Actin cortical patch               |
| Vma6   | Vacuolar H(+) ATPase subunit                           | 2                         | 11.0%             | Vacuole                            |
| Cop1   | Alpha subunit of COPI vesicle coatomer complex         | 6                         | 10.3%             | COPI vesicle coat                  |
| Tpd3   | Protein phosphatase 2A regulatory subunit A            | 2                         | 10.1%             | Bud tip/Bud neck/Cytoplasm/Nucleus |
| Srv2   | Adenylyl cyclase-associated protein                    | 3                         | 10.1%             | Actin cortical patch               |
| Ilv2   | Acetolactate synthase                                  | 3                         | 10.0%             | Mitochondria                       |

---

|       |                                                              |   |      |                                              |
|-------|--------------------------------------------------------------|---|------|----------------------------------------------|
| Hog1  | Mitogen-activated protein kinase                             | 2 | 9.9% | Cytoplasm/Nucleus                            |
| Grh1  | Component of the spindle assembly checkpoint                 | 2 | 9.9% | Golgi/Cytoplasm                              |
| Sac6  | Fimbrin, actin-bundling protein                              | 3 | 9.7% | Actin cortical patch/actin cable             |
| Gpd1  | NAD-dependent glycerol-3-phosphate dehydrogenase             | 2 | 9.7% | Cytosol/Peroxisome                           |
| Ade16 | Enzyme of 'de novo' purine biosynthesis                      | 3 | 9.6% | Cytosol                                      |
| Nma1  | Nicotinic acid mononucleotide adenylyltransferase            | 2 | 9.5% | Cytoplasm/Nucleus                            |
| Tub2  | Beta-tubulin                                                 | 2 | 9.4% | Microtubules                                 |
| Gpd2  | NAD-dependent glycerol 3-phosphate dehydrogenase             | 3 | 9.3% | Cytosol/Mitochondria                         |
| Afg1  | Putative ATPase of the CDC48/PAS1/SEC18 (AAA) family         | 2 | 9.0% | Mitochondria                                 |
| Sfh1  | Homolog of Snf5p                                             | 2 | 8.5% | ER/Nucleus                                   |
| Phb2  | Prohibitin homolog                                           | 2 | 8.3% | Mitochondria                                 |
| Nmt1  | N-myristoyl transferase                                      | 2 | 7.7% | Cytosol                                      |
| Tok1  | Outward-rectifier potassium channel                          | 2 | 7.5% | Plasma membrane                              |
| Pda1  | Pyruvate dehydrogenase alpha subunit                         | 2 | 7.4% | Mitochondria                                 |
| Oac1  | Oxaloacetate transport protein                               | 2 | 7.1% | Mitochondria                                 |
| Sse1  | ATPase that is a component of Hsp90 chaperone complex        | 3 | 6.5% | Cytoplasm                                    |
| Swi6  | Transcription cofactor                                       | 2 | 5.4% | Cytoplasm/Nucleus                            |
| Ypk1  | Serine/threonine protein kinase                              | 2 | 5.4% | Bud neck/Plasma membrane/Cytosol             |
| Krs1  | Lysine-tRNA ligase                                           | 2 | 5.2% | Cytoplasm                                    |
| Rnr1  | Ribonucleotide reductase, large subunit                      | 3 | 5.0% | Cytoplasm                                    |
| Cpa2  | Carbamyl phosphate synthetase                                | 3 | 4.9% | Unknown                                      |
| Hos3  | Histone deacetylase                                          | 2 | 4.9% | Bud neck/Cytoplasm/Nucleus                   |
| Aro4  | 3-deoxy-D-arabino-heptulosonate 7-phosphate synthase         | 2 | 4.9% | Cytoplasm/Nucleus                            |
| Scy1  | Suppressor of GTPase mutant                                  | 2 | 4.6% | Clathrin-coated vesicle                      |
| She4  | Protein binding to myosin motor domains                      | 2 | 4.4% | Cytoplasm                                    |
| Srp54 | Signal recognition particle subunit                          | 2 | 4.4% |                                              |
| Cdc48 | ATPase in ER                                                 | 2 | 4.1% | ER/Cytosol/Nucleus                           |
| Myo2  | Class V myosin                                               | 3 | 4.0% | Actin cable/Actin cap                        |
| Apl2  | Beta-adaptin                                                 | 2 | 3.7% | Clathrin coat of trans-Golgi network vesicle |
| Sec27 | Subunit of the COP II vesicle coat                           | 2 | 3.5% | COPII vesicle coat                           |
| Dop1  | Involved in establishing cellular polarity and morphogenesis | 3 | 3.4% | Cytoplasm/Mitochondria                       |
| Cse1  | mediates the nuclear export of importin alpha                | 2 | 3.4% | Nucleus                                      |

---

---

|       |                                                              |   |      |                              |
|-------|--------------------------------------------------------------|---|------|------------------------------|
| Sla2  | Adaptor protein that links actin to clathrin and endocytosis | 2 | 3.4% | Actin cortical patch/Bud tip |
| Cdc24 | Guanine nucleotide exchange factor for Cdc42p                | 2 | 3.3% | Bud neck/Bud tip/Nucleus     |
| Sro7  | Suppressor of rho3                                           | 2 | 3.3% | Cytosol/Plasma membrane      |
| Ulp2  | Ubiquitin-Like Protein                                       | 2 | 2.8% | Nucleus                      |
| Cdc39 | Basal transcription inhibitor                                | 3 | 2.4% | Cytoplasm/Nucleus            |
| Ufd4  | Ubiquitin-protein ligase (E3)                                | 2 | 2.4% | Cytoplasm/Mitochondria       |
| Isw1  | ATPase component of a chromatin remodeling complex           | 2 | 2.0% | Nucleus                      |
| Aus1  | Transporter of the ATP-binding cassette family               | 2 | 1.9% | Membrane                     |
| Bem2  | Rho GTPase activating protein                                | 2 | 1.6% | Unknown                      |
| Tom1  | Hect-domain-containing protein                               | 2 | 1.1% | Nucleus                      |
| Vps13 | Component of peripheral vacuolar membrane protein complex    | 2 | 1.0% | Endosome/Mitochondria        |

---
