# Supplementary material
Source: PubMed Central journal article supplement (PMC1949386)
Supplement: mbc_E07-03-0274_3.pdf [file mbc_E07-03-0274_3.pdf]

## Supplemental Table 2

### Functional Interaction Levels: TORC1 & Actin-related Genes

#### Level 1: Genetic Interactions with TORC1/2 (8 Genes)

|         |      |
|---------|------|
| YER155C | BEM2 |
| YHR030C | SLT2 |
| YKL126W | YPK1 |
| YAL016W | TPD3 |
| YOR035C | SHE4 |
| YNL138W | SRV2 |
| YNL243W | SLA2 |

#### Level 2: 2X Genetic Interactions with Level 1 Genes (26 Genes)\*

|         |            |         |            |         |           |
|---------|------------|---------|------------|---------|-----------|
| YCR088W | ABP1 (12)  | YBR023C | CHS3 (19)  | YOR326W | MYO2 (3)  |
| YFL039C | ACT1 (14)  | YLR330W | CHS5 (21)  | YOL115W | PAP2 (10) |
| YOR067C | ALG8 (24)  | YHR142W | CHS7 (20)  | YPL031C | PHO85 (1) |
| YBR234C | ARC40 (17) | YHR007C | ERG11 (26) | YOR329C | SCD5 (11) |
| YDL029W | ARP2 (9)   | YLR342W | FKS1 (5)   | YBL061C | SKT5 (16) |
| YJL020C | BBC1 (13)  | YMR307W | GAS1 (6)   | YGR229C | SMI1 (7)  |
| YNL271C | BNI1 (4)   | YJR075W | HOC1 (23)  | YER111C | SWI4 (8)  |
| YDR054C | CDC34 (25) | YNL322C | KRE1 (15)  | YNL079C | TPM1 (2)  |
| YGL206C | CHC1 (22)  | YDR245W | MNN10 (18) |         |           |

\* Note: number in parentheses corresponds to position of indicated gene in Figure 7C

#### Level 3 Genes (Rapamycin filtered) (108 Genes)

|         |       |         |       |         |        |
|---------|-------|---------|-------|---------|--------|
| YLR085C | ARP6  | YCR034W | FEN1  | YDL006W | PTC1   |
| YLR242C | ARV1  | YGL020C | GET1  | YGL058W | RAD6   |
| YLR423C | ATG17 | YER083C | GET2  | YOR275C | RIM20  |
| YAL020C | ATS1  | YNL153C | GIM3  | YNL294C | RIM21  |
| YJL095W | BCK1  | YDR507C | GIN4  | YGL045W | RIM8   |
| YER155C | BEM2  | YOR070C | GYP1  | YBR229C | ROT2   |
| YNL271C | BNI1  | YOR358W | HAP5  | YOR312C | RPL20B |
| YDL074C | BRE1  | YGL168W | HUR1  | YBL072C | RPS8A  |
| YAR014C | BUD14 | YLR384C | IKI3  | YGR056W | RSC1   |
| YMR038C | CCS1  | YKL032C | IXR1  | YLR357W | RSC2   |
| YBR131W | CCZ1  | YPR159W | KRE6  | YGR161C | RTS3   |
| YCR094W | CDC50 | YNL323W | LEM3  | YDR159W | SAC3   |
| YLR418C | CDC73 | YPL055C | LGE1  | YDR389W | SAC7   |
| YLR330W | CHS5  | YDR378C | LSM6  | YLR079W | SIC1   |
| YEL061C | CIN8  | YLR368W | MDM30 | YBR077C | SLM4   |
| YNL298W | CLA4  | YDR245W | MNN10 | YHR030C | SLT2   |
| YPR120C | CLB5  | YML128C | MSC1  | YGR229C | SMI1   |
| YNR041C | COQ2  | YDR335W | MSN5  | YDR477W | SNF1   |
| YPL170W | DAP1  | YDR162C | NBP2  | YPL002C | SNF8   |
| YAL013W | DEP1  | YNL119W | NCS2  | YEL031W | SPF1   |
| YOR030W | DFG16 | YGL211W | NCS6  | YBR081C | SPT7   |
| YMR238W | DFG5  | YGR078C | PAC10 | YCR081W | SRB8   |
| YAL026C | DRS2  | YCR044C | PER1  | YDR293C | SSD1   |
| YBR078W | ECM33 | YOL003C | PFA4  | YDR126W | SWF1   |
| YGR200C | ELP2  | YBL051C | PIN4  | YDR334W | SWR1   |
| YPL086C | ELP3  | YGL167C | PMR1  | YPR040W | TIP41  |
| YMR312W | ELP6  | YML017W | PSP2  | YNL079C | TPM1   |

|         |       |         |       |         |         |
|---------|-------|---------|-------|---------|---------|
| YHR111W | UBA4  | YHR012W | VPS29 | YNL064C | YDJ1    |
| YER151C | UBP3  | YJL154C | VPS35 | YGL081W | YGL081W |
| YDR207C | UME6  | YLR417W | VPS36 | YHR045W | YHR045W |
| YLR386W | VAC14 | YLR360W | VPS38 | YLR200W | YKE2    |
| YOR106W | VAM3  | YKR020W | VPS51 | YKR074W | YKR074W |
| YGL212W | VAM7  | YAL002W | VPS8  | YMR073C | YMR073C |
| YML115C | VAN1  | YML097C | VPS9  | YPL144W | YPL144W |
| YKL041W | VPS24 | YLR337C | VRP1  | YLR262C | YPT6    |
| YPL065W | VPS28 | YNL107W | YAF9  | YJL139C | YUR1    |

**Level 4 Genes (Rapamycin Filtered) (236 Genes)**

|         |       |         |       |         |        |
|---------|-------|---------|-------|---------|--------|
| YFL039C | ACT1  | YBR078W | ECM33 | YML128C | MSC1   |
| YDR448W | ADA2  | YGR200C | ELP2  | YDR335W | MSN5   |
| YPL195W | APL5  | YPL086C | ELP3  | YMR287C | MSU1   |
| YGR261C | APL6  | YMR312W | ELP6  | YDR162C | NBP2   |
| YIL040W | APQ12 | YIL005W | EPS1  | YNL119W | NCS2   |
| YBR164C | ARL1  | YGL054C | ERV14 | YGL211W | NCS6   |
| YPL051W | ARL3  | YOR033C | EXO1  | YDR176W | NGG1   |
| YLR085C | ARP6  | YNL127W | FAR11 | YKL057C | NUP120 |
| YLR242C | ARV1  | YCR034W | FEN1  | YML103C | NUP188 |
| YLR423C | ATG17 | YNL135C | FPR1  | YHL029C | OCA5   |
| YAL020C | ATS1  | YJR040W | GEF1  | YHR073W | OSH3   |
| YJL095W | BCK1  | YGL020C | GET1  | YML019W | OST6   |
| YLR399C | BDF1  | YER083C | GET2  | YGR078C | PAC10  |
| YER155C | BEM2  | YDL198C | GGC1  | YBR221C | PDB1   |
| YNL271C | BNI1  | YNL153C | GIM3  | YCR044C | PER1   |
| YDL074C | BRE1  | YDR507C | GIN4  | YOL003C | PFA4   |
| YPL084W | BRO1  | YER040W | GLN3  | YJL179W | PFD1   |
| YBR290W | BSD2  | YHL031C | GOS1  | YGL025C | PGD1   |
| YFL025C | BST1  | YGR163W | GTR2  | YNL097C | PHO23  |
| YAR014C | BUD14 | YOR070C | GYP1  | YHR034C | PIH1   |
| YJR122W | CAF17 | YGL237C | HAP2  | YBL051C | PIN4   |
| YNL288W | CAF40 | YBL021C | HAP3  | YMR123W | PKR1   |
| YGR036C | CAX4  | YOR358W | HAP5  | YGL167C | PMR1   |
| YMR038C | CCS1  | YBR133C | HSL7  | YDR435C | PPM1   |
| YBR131W | CCZ1  | YGL168W | HUR1  | YML017W | PSP2   |
| YDR364C | CDC40 | YLR384C | IKI3  | YDL006W | PTC1   |
| YCR094W | CDC50 | YER019W | ISC1  | YEL037C | RAD23  |
| YLR418C | CDC73 | YKL032C | IXR1  | YGL058W | RAD6   |
| YLR330W | CHS5  | YDR017C | KCS1  | YJR033C | RAV1   |
| YEL061C | CIN8  | YPR159W | KRE6  | YDR195W | REF2   |
| YNL298W | CLA4  | YKL110C | KTI12 | YFL033C | RIM15  |
| YPR120C | CLB5  | YJL134W | LCB3  | YOR275C | RIM20  |
| YNR041C | COQ2  | YNL323W | LEM3  | YNL294C | RIM21  |
| YNR010W | CSE2  | YPL055C | LGE1  | YGL045W | RIM8   |
| YKL139W | CTK1  | YDR378C | LSM6  | YGR180C | RNR4   |
| YPR124W | CTR1  | YEL053C | MAK10 | YBR229C | ROT2   |
| YGR092W | DBF2  | YBR298C | MAL31 | YGL070C | RPB9   |
| YAL013W | DEP1  | YLR368W | MDM30 | YMR142C | RPL13B |
| YOR030W | DFG16 | YGL219C | MDM34 | YOR312C | RPL20B |
| YMR238W | DFG5  | YLR288C | MEC3  | YIL052C | RPL34B |
| YDL160C | DHH1  | YJR077C | MIR1  | YNL302C | RPS19B |
| YDR069C | DOA4  | YNL076W | MKS1  | YBL072C | RPS8A  |
| YBR278W | DPB3  | YDR245W | MNN10 | YIL153W | RRD1   |
| YAL026C | DRS2  | YJR074W | MOG1  | YPL152W | RRD2   |
| YGL043W | DST1  | YNL297C | MON2  | YHR031C | RRM3   |
| YKL204W | EAP1  | YIR021W | MRS1  | YGR056W | RSC1   |

|         |       |         |       |         |         |
|---------|-------|---------|-------|---------|---------|
| YLR357W | RSC2  | YAR003W | SWD1  | YMR077C | VPS20   |
| YGL244W | RTF1  | YBR175W | SWD3  | YKL041W | VPS24   |
| YGL252C | RTG2  | YDR126W | SWF1  | YPL065W | VPS28   |
| YBL103C | RTG3  | YDR334W | SWR1  | YHR012W | VPS29   |
| YGR161C | RTS3  | YJL004C | SYS1  | YDR495C | VPS3    |
| YBR095C | RXT2  | YDR145W | TAF12 | YJL154C | VPS35   |
| YDR159W | SAC3  | YPL129W | TAF14 | YLR417W | VPS36   |
| YDR389W | SAC7  | YOR337W | TEA1  | YLR360W | VPS38   |
| YER120W | SCS2  | YKL081W | TEF4  | YPR173C | VPS4    |
| YDR469W | SDC1  | YHR167W | THP2  | YDR080W | VPS41   |
| YJL168C | SET2  | YPR040W | TIP41 | YKR020W | VPS51   |
| YLR058C | SHM2  | YOL018C | TLG2  | YDR484W | VPS52   |
| YGR112W | SHY1  | YJR066W | TOR1  | YJL029C | VPS53   |
| YLR079W | SIC1  | YNL079C | TPM1  | YDR027C | VPS54   |
| YBR077C | SLM4  | YBR126C | TPS1  | YDR200C | VPS64   |
| YHR030C | SLT2  | YML014W | TRM9  | YAL002W | VPS8    |
| YGR229C | SMI1  | YML085C | TUB1  | YML097C | VPS9    |
| YDR477W | SNF1  | YOR187W | TUF1  | YLR337C | VRP1    |
| YPL002C | SNF8  | YCR084C | TUP1  | YOR043W | WHI2    |
| YJR104C | SOD1  | YHR111W | UBA4  | YNL107W | YAF9    |
| YEL031W | SPF1  | YER151C | UBP3  | YNL064C | YDJ1    |
| YOL148C | SPT20 | YDR207C | UME6  | YGL081W | YGL081W |
| YDR392W | SPT3  | YNL229C | URE2  | YGR206W | YGR206W |
| YBR081C | SPT7  | YLR386W | VAC14 | YLR200W | YKE2    |
| YLR055C | SPT8  | YEL013W | VAC8  | YKR074W | YKR074W |
| YCR081W | SRB8  | YOR106W | VAM3  | YMR073C | YMR073C |
| YLR119W | SRN2  | YGL212W | VAM7  | YMR166C | YMR166C |
| YAL005C | SSA1  | YML115C | VAN1  | YPL144W | YPL144W |
| YDR293C | SSD1  | YLR410W | VIP1  | YLR262C | YPT6    |
| YPL042C | SSN3  | YPR036W | VMA13 | YML001W | YPT7    |
| YMR125W | STO1  | YKL080W | VMA5  | YJL139C | YUR1    |
| YDR320C | SWA2  | YKL119C | VPH2  | YMR273C | ZDS1    |
| YAL011W | SWC3  | YPL045W | VPS16 |         |         |

**Level 5 Genes (Rapamycin Filtered) (256 Genes)**

|         |       |         |       |         |       |
|---------|-------|---------|-------|---------|-------|
| YFL039C | ACT1  | YJR122W | CAF17 | YDL160C | DHH1  |
| YDR448W | ADA2  | YNL288W | CAF40 | YHR011W | DIA4  |
| YNL148C | ALF1  | YGR036C | CAX4  | YDR069C | DOA4  |
| YPL195W | APL5  | YMR038C | CCS1  | YBR278W | DPB3  |
| YGR261C | APL6  | YBR131W | CCZ1  | YAL026C | DRS2  |
| YIL040W | APQ12 | YDR364C | CDC40 | YGL043W | DST1  |
| YBR164C | ARL1  | YCR094W | CDC50 | YKL204W | EAP1  |
| YPL051W | ARL3  | YLR418C | CDC73 | YBR078W | ECM33 |
| YLR085C | ARP6  | YLR330W | CHS5  | YGR200C | ELP2  |
| YLR242C | ARV1  | YEL061C | CIN8  | YPL086C | ELP3  |
| YLR423C | ATG17 | YOR061W | CKA2  | YMR312W | ELP6  |
| YAL020C | ATS1  | YNL298W | CLA4  | YIL005W | EPS1  |
| YJL095W | BCK1  | YPR120C | CLB5  | YGL054C | ERV14 |
| YLR399C | BDF1  | YNR041C | COQ2  | YOR033C | EXO1  |
| YER155C | BEM2  | YNR010W | CSE2  | YNL127W | FAR11 |
| YNL271C | BNI1  | YKL139W | CTK1  | YCR034W | FEN1  |
| YDL074C | BRE1  | YPR124W | CTR1  | YNL135C | FPR1  |
| YPL084W | BRO1  | YPL170W | DAP1  | YJR040W | GEF1  |
| YBR290W | BSD2  | YGR092W | DBF2  | YGL020C | GET1  |
| YFL025C | BST1  | YAL013W | DEP1  | YER083C | GET2  |
| YAR014C | BUD14 | YOR030W | DFG16 | YDL198C | GGC1  |
| YLR074C | BUD20 | YMR238W | DFG5  | YNL153C | GIM3  |

|         |        |         |        |         |       |
|---------|--------|---------|--------|---------|-------|
| YDR507C | GIN4   | YGL167C | PMR1   | YMR125W | STO1  |
| YER040W | GLN3   | YDR435C | PPM1   | YDR320C | SWA2  |
| YHR183W | GND1   | YOL061W | PRS5   | YAL011W | SWC3  |
| YHL031C | GOS1   | YML017W | PSP2   | YAR003W | SWD1  |
| YML121W | GTR1   | YDL006W | PTC1   | YBR175W | SWD3  |
| YGR163W | GTR2   | YEL037C | RAD23  | YDR126W | SWF1  |
| YOR070C | GYP1   | YGL058W | RAD6   | YDR334W | SWR1  |
| YGL237C | HAP2   | YJR033C | RAV1   | YGR129W | SYF2  |
| YBL021C | HAP3   | YDR195W | REF2   | YJL004C | SYS1  |
| YOR358W | HAP5   | YDR028C | REG1   | YDR145W | TAF12 |
| YJR139C | HOM6   | YFL033C | RIM15  | YPL129W | TAF14 |
| YBR133C | HSL7   | YOR275C | RIM20  | YOR337W | TEA1  |
| YGL168W | HUR1   | YNL294C | RIM21  | YKL081W | TEF4  |
| YLR384C | IKI3   | YGL045W | RIM8   | YHR167W | THP2  |
| YCR071C | IMG2   | YGR180C | RNR4   | YPR040W | TIP41 |
| YER019W | ISC1   | YBR229C | ROT2   | YOL018C | TLG2  |
| YKL032C | IXR1   | YGL070C | RPB9   | YJR066W | TOR1  |
| YDR017C | KCS1   | YMR142C | RPL13B | YNL079C | TPM1  |
| YPR159W | KRE6   | YOR312C | RPL20B | YBR126C | TPS1  |
| YKL110C | KTI12  | YIL052C | RPL34B | YML014W | TRM9  |
| YJL134W | LCB3   | YNL302C | RPS19B | YML085C | TUB1  |
| YNL323W | LEM3   | YBL072C | RPS8A  | YOR187W | TUF1  |
| YPL055C | LGE1   | YIL153W | RRD1   | YCR084C | TUP1  |
| YKL073W | LHS1   | YPL152W | RRD2   | YHR111W | UBA4  |
| YDR378C | LSM6   | YHR031C | RRM3   | YDL122W | UBP1  |
| YEL053C | MAK10  | YGR056W | RSC1   | YER151C | UBP3  |
| YBR298C | MAL31  | YLR357W | RSC2   | YOR075W | UFE1  |
| YLR368W | MDM30  | YGL244W | RTF1   | YDR207C | UME6  |
| YGL219C | MDM34  | YGL252C | RTG2   | YNL229C | URE2  |
| YLR288C | MEC3   | YBL103C | RTG3   | YLR386W | VAC14 |
| YJR077C | MIR1   | YGR161C | RTS3   | YEL013W | VAC8  |
| YNL076W | MKS1   | YBR095C | RXT2   | YOR106W | VAM3  |
| YDR245W | MNN10  | YDR159W | SAC3   | YGL212W | VAM7  |
| YJR074W | MOG1   | YDR389W | SAC7   | YML115C | VAN1  |
| YNL297C | MON2   | YCR008W | SAT4   | YLR410W | VIP1  |
| YIR021W | MRS1   | YER120W | SCS2   | YPR036W | VMA13 |
| YML128C | MSC1   | YDR469W | SDC1   | YKL080W | VMA5  |
| YDR335W | MSN5   | YJL168C | SET2   | YKL119C | VPH2  |
| YMR287C | MSU1   | YLR058C | SHM2   | YPL045W | VPS16 |
| YDR162C | NBP2   | YGR112W | SHY1   | YMR077C | VPS20 |
| YNL119W | NCS2   | YLR079W | SIC1   | YKL041W | VPS24 |
| YGL211W | NCS6   | YBR077C | SLM4   | YPL065W | VPS28 |
| YDR176W | NGG1   | YHR030C | SLT2   | YHR012W | VPS29 |
| YKL057C | NUP120 | YGR229C | SMI1   | YDR495C | VPS3  |
| YML103C | NUP188 | YDR477W | SNF1   | YJL154C | VPS35 |
| YHL029C | OCA5   | YPL002C | SNF8   | YLR417W | VPS36 |
| YHR073W | OSH3   | YJR104C | SOD1   | YLR360W | VPS38 |
| YML019W | OST6   | YMR066W | SOV1   | YPR173C | VPS4  |
| YDR071C | PAA1   | YEL031W | SPF1   | YDR080W | VPS41 |
| YGR078C | PAC10  | YOL148C | SPT20  | YKR020W | VPS51 |
| YBR221C | PDB1   | YDR392W | SPT3   | YDR484W | VPS52 |
| YCR044C | PER1   | YBR081C | SPT7   | YJL029C | VPS53 |
| YOL003C | PFA4   | YLR055C | SPT8   | YDR027C | VPS54 |
| YJL179W | PFD1   | YCR081W | SRB8   | YDR200C | VPS64 |
| YGL025C | PGD1   | YLR119W | SRN2   | YAL002W | VPS8  |
| YNL097C | PHO23  | YAL005C | SSA1   | YML097C | VPS9  |
| YHR034C | PIH1   | YDR293C | SSD1   | YLR337C | VRP1  |
| YBL051C | PIN4   | YPL042C | SSN3   | YOR043W | WHI2  |
| YMR123W | PKR1   | YHR064C | SSZ1   | YNL107W | YAF9  |

|         |         |         |         |         |      |
|---------|---------|---------|---------|---------|------|
| YNL064C | YDJ1    | YKR074W | YKR074W | YML001W | YPT7 |
| YGL081W | YGL081W | YMR073C | YMR073C | YJL139C | YUR1 |
| YGR206W | YGR206W | YMR166C | YMR166C | YMR273C | ZDS1 |
| YHR045W | YHR045W | YPL144W | YPL144W |         |      |
| YLR200W | YKE2    | YLR262C | YPT6    |         |      |

**Level 6 Genes (Rapamycin Filtered) (257 Genes)**

|         |       |         |       |         |        |
|---------|-------|---------|-------|---------|--------|
| YFL039C | ACT1  | YKL204W | EAP1  | YNL297C | MON2   |
| YDR448W | ADA2  | YBR078W | ECM33 | YIR021W | MRS1   |
| YNL148C | ALF1  | YGR200C | ELP2  | YML128C | MSC1   |
| YPL195W | APL5  | YPL086C | ELP3  | YDR335W | MSN5   |
| YGR261C | APL6  | YMR312W | ELP6  | YMR287C | MSU1   |
| YIL040W | APQ12 | YIL005W | EPS1  | YDR162C | NBP2   |
| YBR164C | ARL1  | YGL054C | ERV14 | YNL119W | NCS2   |
| YPL051W | ARL3  | YOR033C | EXO1  | YGL211W | NCS6   |
| YLR085C | ARP6  | YNL127W | FAR11 | YDR176W | NGG1   |
| YLR242C | ARV1  | YCR034W | FEN1  | YKL057C | NUP120 |
| YLR423C | ATG17 | YNL135C | FPR1  | YML103C | NUP188 |
| YAL020C | ATS1  | YJR040W | GEF1  | YHL029C | OCA5   |
| YJL095W | BCK1  | YGL020C | GET1  | YHR073W | OSH3   |
| YLR399C | BDF1  | YER083C | GET2  | YML019W | OST6   |
| YER155C | BEM2  | YDL198C | GGC1  | YDR071C | PAA1   |
| YNL271C | BNI1  | YNL153C | GIM3  | YGR078C | PAC10  |
| YDL074C | BRE1  | YDR507C | GIN4  | YBR221C | PDB1   |
| YPL084W | BRO1  | YER040W | GLN3  | YCR044C | PER1   |
| YBR290W | BSD2  | YHR183W | GND1  | YOL003C | PFA4   |
| YFL025C | BST1  | YHL031C | GOS1  | YJL179W | PFD1   |
| YAR014C | BUD14 | YML121W | GTR1  | YGL025C | PGD1   |
| YLR074C | BUD20 | YGR163W | GTR2  | YNL097C | PHO23  |
| YJR122W | CAF17 | YOR070C | GYP1  | YHR034C | PIH1   |
| YNL288W | CAF40 | YGL237C | HAP2  | YBL051C | PIN4   |
| YGR036C | CAX4  | YBL021C | HAP3  | YMR123W | PKR1   |
| YMR038C | CCS1  | YOR358W | HAP5  | YGL167C | PMR1   |
| YBR131W | CCZ1  | YJR139C | HOM6  | YDR435C | PPM1   |
| YDR364C | CDC40 | YBR133C | HSL7  | YOL061W | PR5    |
| YCR094W | CDC50 | YGL168W | HUR1  | YML017W | PSP2   |
| YLR418C | CDC73 | YLR384C | IKI3  | YDL006W | PTC1   |
| YLR330W | CHS5  | YCR071C | IMG2  | YEL037C | RAD23  |
| YEL061C | CIN8  | YER019W | ISC1  | YGL058W | RAD6   |
| YOR061W | CKA2  | YKL032C | IXR1  | YJR033C | RAV1   |
| YNL298W | CLA4  | YDR017C | KCS1  | YDR195W | REF2   |
| YPR120C | CLB5  | YPR159W | KRE6  | YDR028C | REG1   |
| YNR041C | COQ2  | YKL110C | KTI12 | YFL033C | RIM15  |
| YNR010W | CSE2  | YJL134W | LCB3  | YOR275C | RIM20  |
| YKL139W | CTK1  | YNL323W | LEM3  | YNL294C | RIM21  |
| YPR124W | CTR1  | YPL055C | LGE1  | YGL045W | RIM8   |
| YPL170W | DAP1  | YKL073W | LHS1  | YGR180C | RNR4   |
| YGR092W | DBF2  | YDR378C | LSM6  | YBR229C | ROT2   |
| YAL013W | DEP1  | YEL053C | MAK10 | YGL070C | RPB9   |
| YOR030W | DFG16 | YBR298C | MAL31 | YMR142C | RPL13B |
| YMR238W | DFG5  | YLR368W | MDM30 | YOR312C | RPL20B |
| YDL160C | DHH1  | YGL219C | MDM34 | YIL052C | RPL34B |
| YHR011W | DIA4  | YLR288C | MEC3  | YNL302C | RPS19B |
| YDR069C | DOA4  | YJR077C | MIR1  | YBL072C | RPS8A  |
| YBR278W | DPB3  | YNL076W | MKS1  | YIL153W | RRD1   |
| YAL026C | DRS2  | YDR245W | MNN10 | YPL152W | RRD2   |
| YGL043W | DST1  | YJR074W | MOG1  | YHR031C | RRM3   |

|         |       |         |       |         |         |
|---------|-------|---------|-------|---------|---------|
| YGR056W | RSC1  | YDR320C | SWA2  | YKL119C | VPH2    |
| YLR357W | RSC2  | YAL011W | SWC3  | YPL045W | VPS16   |
| YGL244W | RTF1  | YAR003W | SWD1  | YMR077C | VPS20   |
| YGL252C | RTG2  | YBR175W | SWD3  | YKL041W | VPS24   |
| YBL103C | RTG3  | YDR126W | SWF1  | YPL065W | VPS28   |
| YGR161C | RTS3  | YDR334W | SWR1  | YHR012W | VPS29   |
| YBR095C | RXT2  | YGR129W | SYF2  | YDR495C | VPS3    |
| YDR159W | SAC3  | YJL004C | SYS1  | YJL154C | VPS35   |
| YDR389W | SAC7  | YDR145W | TAF12 | YLR417W | VPS36   |
| YCR008W | SAT4  | YPL129W | TAF14 | YLR360W | VPS38   |
| YER120W | SCS2  | YOR337W | TEA1  | YPR173C | VPS4    |
| YDR469W | SDC1  | YKL081W | TEF4  | YDR080W | VPS41   |
| YJL168C | SET2  | YHR167W | THP2  | YKR020W | VPS51   |
| YLR058C | SHM2  | YPR040W | TIP41 | YDR484W | VPS52   |
| YGR112W | SHY1  | YOL018C | TLG2  | YJL029C | VPS53   |
| YLR079W | SIC1  | YJR066W | TOR1  | YDR027C | VPS54   |
| YBR077C | SLM4  | YNL079C | TPM1  | YDR200C | VPS64   |
| YHR030C | SLT2  | YBR126C | TPS1  | YAL002W | VPS8    |
| YGR229C | SMI1  | YML014W | TRM9  | YML097C | VPS9    |
| YDR477W | SNF1  | YML085C | TUB1  | YLR337C | VRP1    |
| YPL002C | SNF8  | YOR187W | TUF1  | YOR043W | WHI2    |
| YJR104C | SOD1  | YCR084C | TUP1  | YNL107W | YAF9    |
| YMR066W | SOV1  | YHR111W | UBA4  | YNL064C | YDJ1    |
| YEL031W | SPF1  | YDL122W | UBP1  | YGL081W | YGL081W |
| YOL148C | SPT20 | YER151C | UBP3  | YGR206W | YGR206W |
| YDR392W | SPT3  | YOR075W | UFE1  | YHR045W | YHR045W |
| YBR081C | SPT7  | YDR207C | UME6  | YLR200W | YKE2    |
| YLR055C | SPT8  | YNL229C | URE2  | YKR074W | YKR074W |
| YCR081W | SRB8  | YLR386W | VAC14 | YMR073C | YMR073C |
| YLR119W | SRN2  | YEL013W | VAC8  | YMR166C | YMR166C |
| YAL005C | SSA1  | YOR106W | VAM3  | YPL144W | YPL144W |
| YDR293C | SSD1  | YGL212W | VAM7  | YLR262C | YPT6    |
| YPL042C | SSN3  | YML115C | VAN1  | YML001W | YPT7    |
| YHR064C | SSZ1  | YLR410W | VIP1  | YJL139C | YUR1    |
| YHR084W | STE12 | YPR036W | VMA13 | YMR273C | ZDS1    |
| YMR125W | STO1  | YKL080W | VMA5  |         |         |
